# Supplementary material
Source: publisher figshare collection journal article supplement (https://gsajournals.figshare.com/ndownloader/files/26510942)
Supplement: Supplementary file 1 [file 26510942]

## Sheet: ST cazymes
Supplementary Table 8. Distribution of CAZyme modules in the proteomes of the Nectriaceous fungi used in this study
CAZyme families	CBM1	CBM13	CBM18	CBM20	CBM21	CBM24	CBM32	CBM35	CBM42	CBM43	CBM48	CBM50	CBM63	CBM66	CBM67	Total	% All CAZyme				Total CAZyme modulesfound
Neonectria faginata CBS 134246	6	1	3	3	1	0	0	2	0	0	13	9	3	1	5	47	6.20872			N. faginata	757
Neonectria coccinea CBS 119158	5	1	3	2	1	0	0	1	0	2	12	5	3	1	6	42	5.56291			N. coccinea	755
Neonectria ditissima CBS 226.31	6	2	4	4	1	1	0	2	1	2	12	8	2	1	8	54	6.78392			N. ditissima	796
Corinectria fuckeliana CBS 125109	3	1	4	2	1	0	0	2	1	1	11	7	2	1	3	39	6.2201			C. fuckeliana	627
Thelonectria rubi CBS 177.27	4	2	8	4	1	0	2	1	1	2	11	11	2	1	3	53	7.87519			T. rubi	673
CAZyme families	CE1	CE10	CE12	CE16	CE3	CE4	CE5	CE8	CE9	Total	% All CAZyme
Neonectria faginata CBS 134246	3	50	2	8	8	11	8	9	1	100	13.21
Neonectria coccinea CBS 119158	1	48	2	7	8	11	9	8	1	95	12.5828
Neonectria ditissima CBS 226.31	2	58	2	7	10	10	9	12	1	111	13.9447
Corinectria fuckeliana CBS 125109	2	36	2	6	5	10	5	10	1	77	12.2807
Thelonectria rubi CBS 177.27	4	40	2	11	4	10	6	13	1	91	13.5215
CAZyme families	GH0	GH1	GH10	GH105	GH109	GH11	GH114	GH115	GH12	GH125	GH127	GH128	GH13	GH131	GH132	GH135	GH145	GH146	GH15	GH152	GH154	GH16	GH162	GH17
Neonectria faginata CBS 134246	3	5	4	4	1	2	5	4	7	2	1	3	10	3	3	2	1	3	2	2	3	29	1	6
Neonectria coccinea CBS 119158	3	5	3	4	1	2	5	3	6	2	2	3	10	3	3	2	1	3	2	2	3	27	1	6
Neonectria ditissima CBS 226.31	4	5	3	4	1	2	5	2	7	2	1	3	9	3	3	2	1	3	2	2	3	28	1	6
Corinectria fuckeliana CBS 125109	3	5	1	4	0	2	2	2	6	2	0	3	8	3	3	1	1	1	2	2	2	23	1	6
Thelonectria rubi CBS 177.27	2	4	4	2	2	2	4	1	7	2	1	3	7	3	3	2	0	2	5	1	0	26	1	6
CAZyme families	GH18	GH19	GH2	GH20	GH23	GH24	GH27	GH28	GH3	GH30	GH31	GH32	GH33	GH35	GH36	GH37	GH38	GH39	GH43	GH45	GH47	GH49	GH5	GH51
Neonectria faginata CBS 134246	26	1	10	3	0	1	0	12	26	1	11	3	0	4	3	3	1	1	22	2	10	1	16	3
Neonectria coccinea CBS 119158	24	1	10	3	1	1	1	14	22	1	10	3	1	3	4	3	1	2	21	2	11	1	15	3
Neonectria ditissima CBS 226.31	26	1	11	3	0	1	1	15	28	1	10	4	1	5	4	3	1	2	25	1	12	1	17	3
Corinectria fuckeliana CBS 125109	23	1	6	2	1	1	0	10	14	1	6	3	1	3	3	3	1	0	16	1	12	1	16	3
Thelonectria rubi CBS 177.27	30	0	4	2	0	1	0	10	19	2	5	2	0	3	4	3	1	0	18	2	10	0	13	3
CAZyme families	GH53	GH54	GH55	GH6	GH62	GH63	GH64	GH7	GH71	GH72	GH74	GH75	GH76	GH78	GH79	GH81	GH84	GH88	GH92	GH93	GH95	Total	% All CAZyme
Neonectria faginata CBS 134246	1	0	4	4	0	1	3	3	5	4	1	3	8	12	1	1	0	2	0	4	1	324	42.8005
Neonectria coccinea CBS 119158	1	0	4	4	0	1	2	3	4	4	1	3	8	14	1	1	0	2	0	3	1	317	41.9868
Neonectria ditissima CBS 226.31	1	1	3	4	0	1	2	3	5	4	1	2	8	17	1	1	0	3	1	4	2	342	42.9648
Corinectria fuckeliana CBS 125109	1	1	3	4	0	1	2	3	4	4	3	3	7	9	0	1	1	1	0	3	1	263	41.9458
Thelonectria rubi CBS 177.27	1	1	5	4	2	1	2	2	4	5	1	3	7	10	1	1	0	0	0	2	1	275	40.8618
CAZyme families	GT0	GT1	GT13	GT15	GT17	GT2	GT20	GT21	GT22	GT24	GT25	GT3	GT30	GT31	GT32	GT33	GT34	GT35	GT39	GT4	GT41	GT48	GT50	GT54
Neonectria faginata CBS 134246	2	12	2	5	1	32	3	1	7	1	1	1	1	10	7	1	3	1	3	9	1	2	1	0
Neonectria coccinea CBS 119158	2	12	2	5	1	34	3	1	7	1	1	1	1	10	8	1	3	1	3	10	2	2	1	0
Neonectria ditissima CBS 226.31	2	10	1	5	1	33	3	1	7	1	1	1	1	6	8	1	3	1	3	10	1	2	1	0
Corinectria fuckeliana CBS 125109	2	9	1	4	1	35	3	1	7	1	1	1	1	10	7	1	4	1	3	8	1	1	1	1
Thelonectria rubi CBS 177.27	2	8	1	5	1	30	3	1	7	1		1	1	9	6	1	2	1	3	9	1	2	1	0
CAZyme families	GT57	GT58	GT59	GT62	GT64	GT66	GT69	GT7	GT71	GT76	GT8	GT87	GT90	GT95	Total	% All CAZyme
Neonectria faginata CBS 134246	4	1	1	3	2	1	3	2	2	1	6	1	6	1	141	18.6262
Neonectria coccinea CBS 119158	4	1	1	3	2	1	3	2	2	1	7	2	5	1	147	19.4702
Neonectria ditissima CBS 226.31	4	1	1	3	2	1	3	2	2	1	6	1	5	1	136	17.0854
Corinectria fuckeliana CBS 125109	4	1	1	3	3	1	3	2	3	1	6	1	6	1	141	22.488
Thelonectria rubi CBS 177.27	4	1	1	3	2	1	4	2	3	1	5	1	5	1	130	19.3165
CAZyme families	PL1	PL20	PL26	PL29	PL3	PL4	PL9	Total	% All CAZyme
Neonectria faginata CBS 134246	16	0	2	0	9	4	2	33	4.35931
Neonectria coccinea CBS 119158	15	0	2	1	8	4	2	32	4.23841
Neonectria ditissima CBS 226.31	13	0	2	0	10	5	2	32	4.0201
Corinectria fuckeliana CBS 125109	9	0	2	0	6	4	1	22	3.50877
Thelonectria rubi CBS 177.27	11	1	1	1	7	4	1	26	3.8633
CAZyme families	AA1	AA11	AA12	AA13	AA14	AA16	AA2	AA3	AA4	AA5	AA6	AA7	AA8	AA9	Total	% All CAZyme
Neonectria faginata CBS 134246	12	5	1	2	0	1	7	24	6	2	1	29	11	11	112	14.7952
Neonectria coccinea CBS 119158	12	5	1	2	1	1	10	27	6	0	1	32	14	10	122	16.1589
Neonectria ditissima CBS 226.31	10	5	1	1	1	1	7	26	5	1	1	40	11	11	121	15.201
Corinectria fuckeliana CBS 125109	9	5	1	0	1	1	5	21	5	0	1	18	8	10	85	13.5566
Thelonectria rubi CBS 177.27	12	5	1	0	1	1	6	21	3	2	1	28	10	7	98	14.5617
